# Supplementary material
Source: PubMed Central journal article supplement (PMC10335627)
Supplement: NIHMS1906471-supplement-1.pdf [file NIHMS1906471-supplement-1.pdf]

# Figure S2

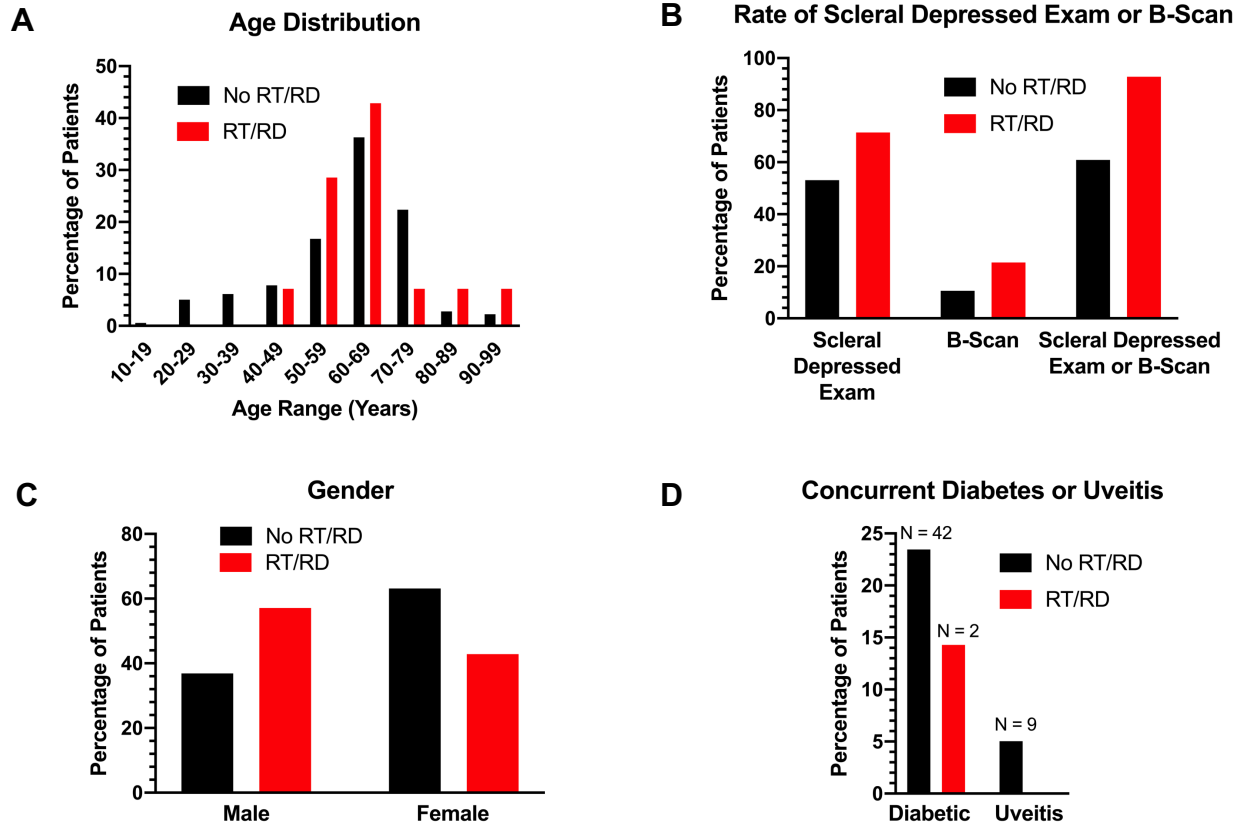

**Figure S2. Additional Demographics and Physical Exam Characteristics for Screened Patients.** (A) Age distribution of patients with and without RT/RDs, (B) Follow-up physical exam, (C) Gender in patients with and without RT/RDs, (D) Presence of diabetes or uveitis in patients with or without RT/RDs.

# Figure S3

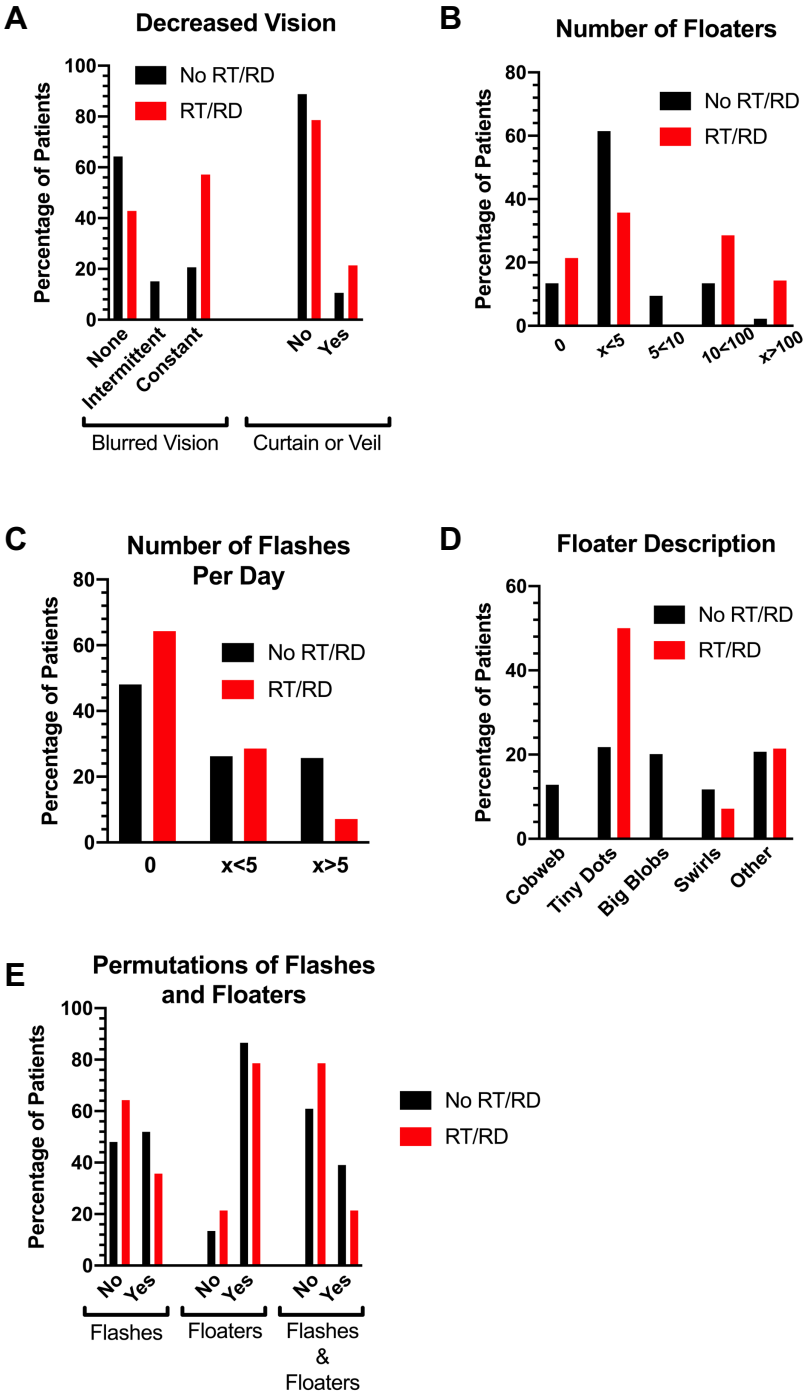

**Figure S3. Symptoms in Patients With and Without RT/RDs.** (A) Blurred vision or curtain/veil, (B) Number of floaters, (C) Number of flashes, (D) Description of floaters, (E) Patients with both flashes and floaters.

## Figure S4

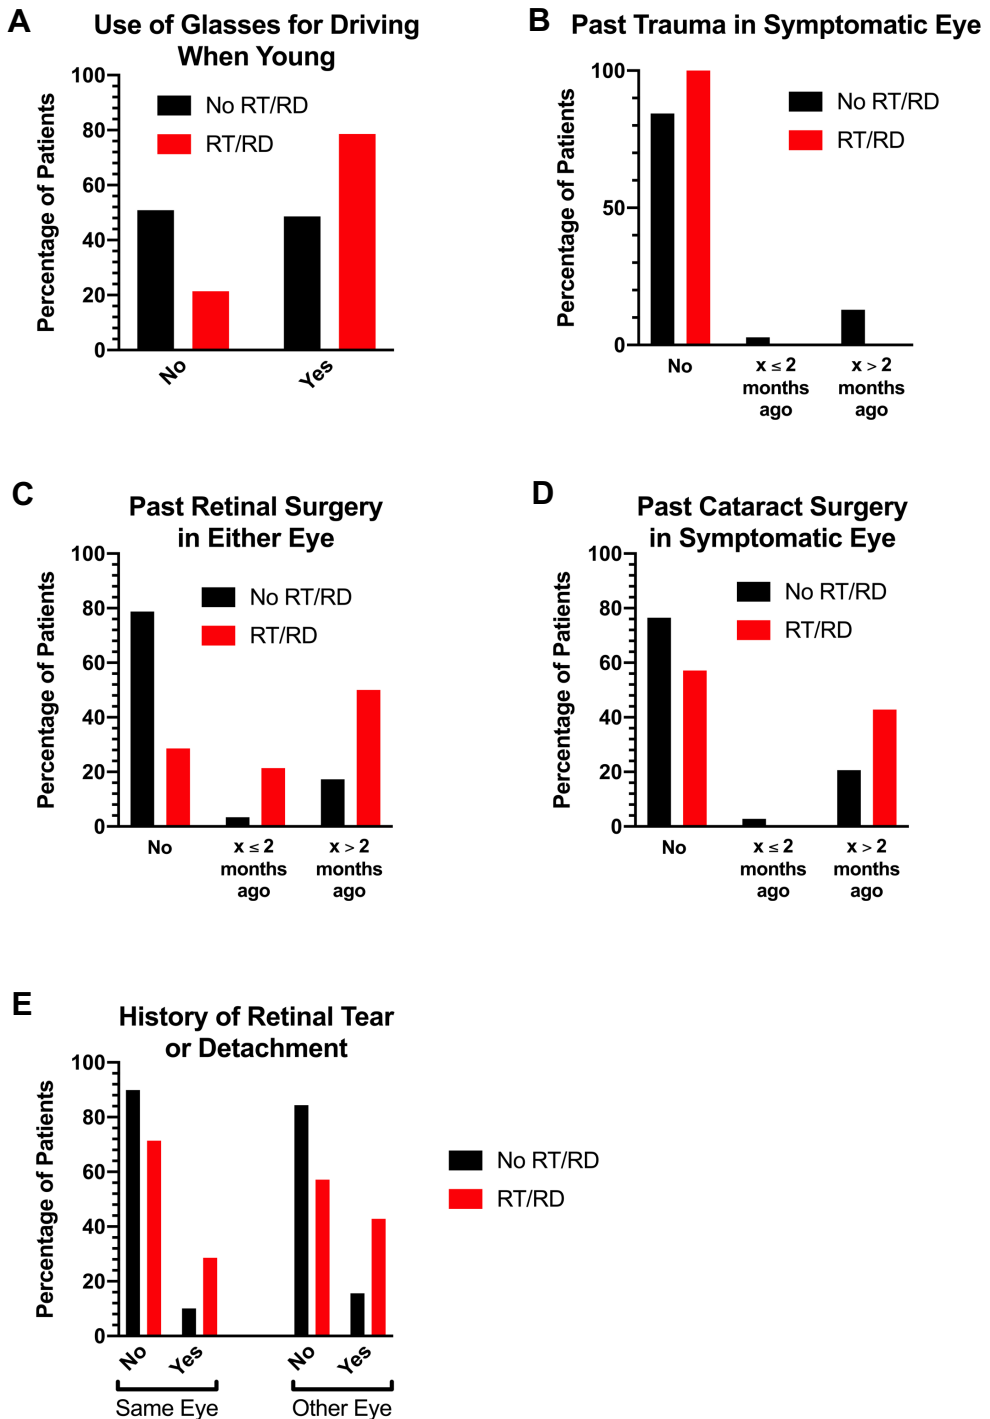

**Figure S4. Ophthalmic History in Patients With and Without RT/RDs.** (A) Use of glasses for driving when young (proxy for myopia), (B) Past eye trauma, (C) Past retinal surgery in either eye, (D) Past cataract surgery in symptomatic eye, (E) History of retinal tear or detachment in symptomatic or fellow eye.

## Figure S6

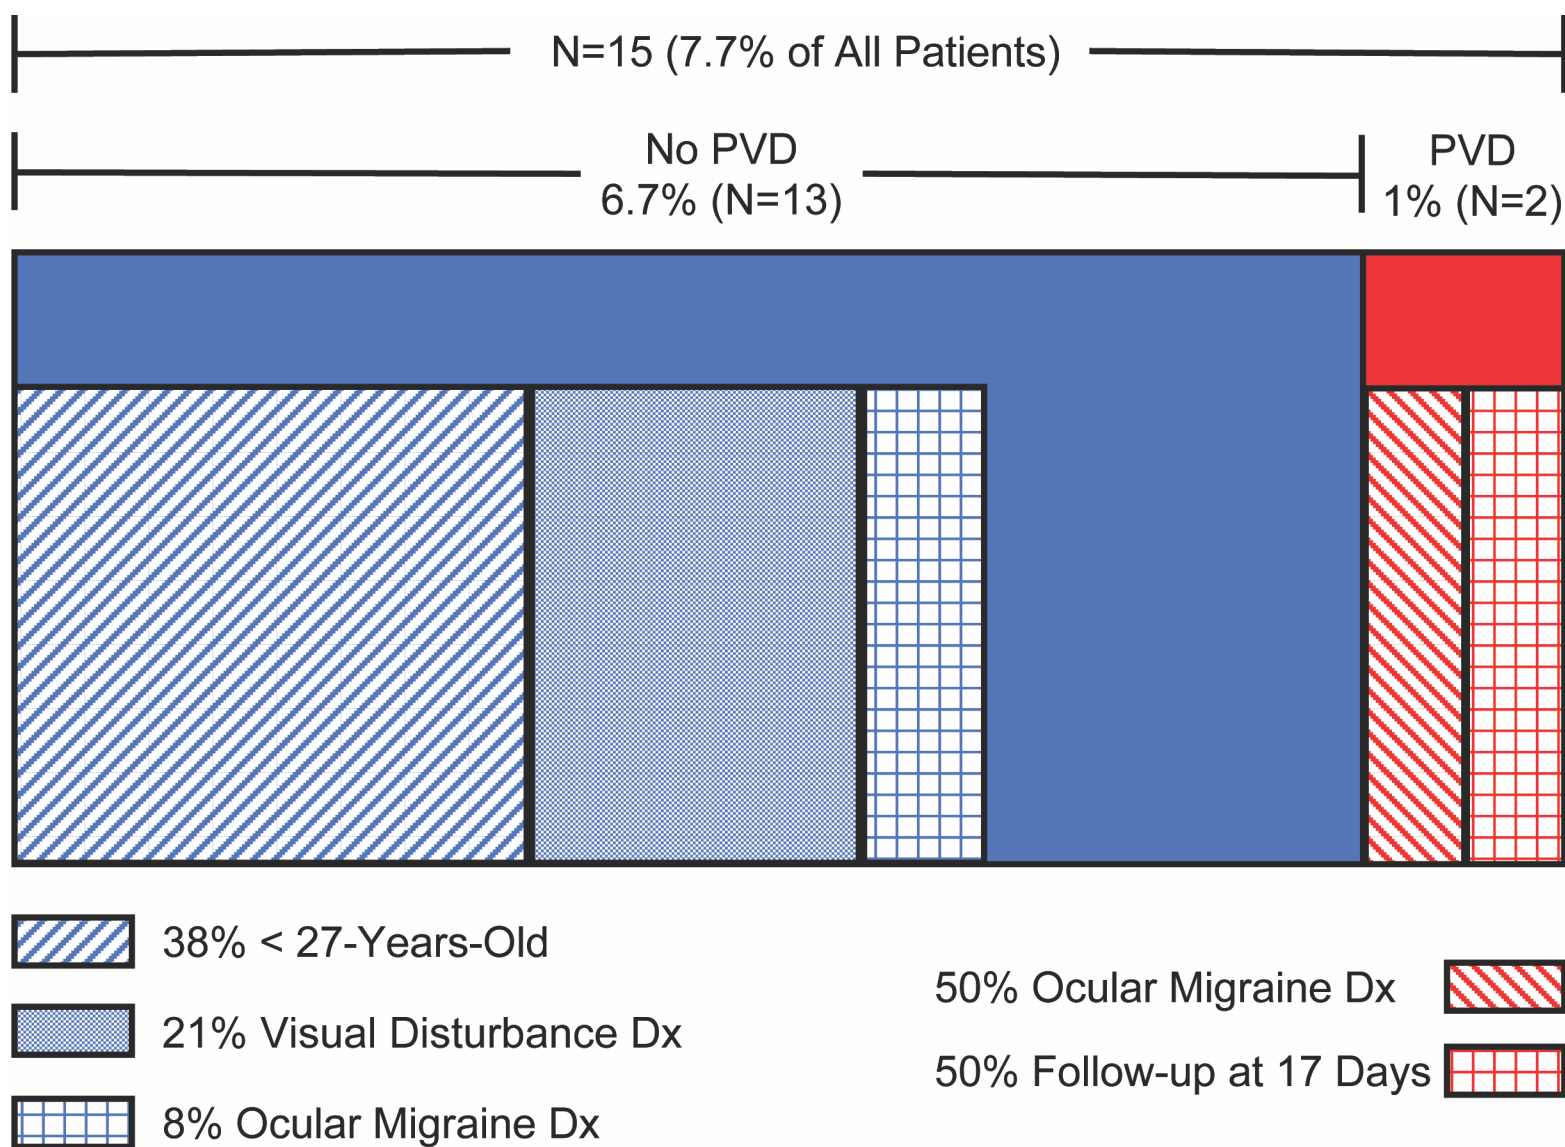

**Figure S6. Demographic Features, Physical Exam Characteristics, and Diagnoses of Patients Without a Scleral Depressed Exam (SDE) or B-scan on First Follow-Up Visit and Who Did Not Have a Follow-Up Visit at Least Four Weeks After Phone Triage.** 15 patients (7.7% of all patients included in the study) that did not have an SDE or B-scan at their first clinical examination did not have follow-up four weeks or more from their phone triage date. Of these 15 patients, 13 did not have a PVD (and no Shafer's sign or vitreous hemorrhage either), making them extremely low risk for a missed RT/RD. Two patients did have a PVD. However, one of these patients had a pre-existing PVD and their symptoms were attributed to ocular migraine. That leaves a single patient who failed to undergo SDE or B-scan and actually had a symptomatic PVD. This patient was seen 17 days after their phone triage, but not seen again, and again did not have Shafer's sign or vitreous hemorrhage.

| Variable                            | Level                                            | OR                | 95% OR<br>CI Lower | 95% OR<br>CI Upper | P-value        | Global<br>P-Value |
|-------------------------------------|--------------------------------------------------|-------------------|--------------------|--------------------|----------------|-------------------|
| Age                                 | N/A                                              | 1.02              | 0.98               | 1.06               | 0.3689         |                   |
| <b>Sex</b>                          | <b>Male vs. Female</b>                           | <b>2.28</b>       | <b>0.76</b>        | <b>6.87</b>        | <b>0.1418</b>  |                   |
| Clinic Association                  | Comprehensive vs. Retina                         | 0.31              | 0.04               | 2.52               | 0.2720         | 0.5460            |
|                                     | New vs. Retina                                   | 0.92              | 0.27               | 3.13               | 0.8904         |                   |
| <i>Eye</i>                          | <i>OD/OS vs. OU</i>                              | <i>&gt;999.99</i> | <i>&lt;0.001</i>   | <i>&gt;999.99</i>  | <i>0.3687*</i> |                   |
| Start of Symptoms                   | 1-2 Weeks Ago vs. Within 24 Hours                | 0.24              | 0.03               | 1.99               | 0.1842         | 0.6181            |
|                                     | 3-7 Days Ago vs. Within 24 Hours                 | <0.001            | <0.001             | >999.999           | 0.9594         |                   |
|                                     | More than 2 Weeks Ago vs. Within 24 Hours        | 0.41              | 0.08               | 2.06               | 0.2802         |                   |
|                                     | Within 72 Hours vs. Within 24 Hours              | 0.58              | 0.14               | 2.34               | 0.4442         |                   |
| <b>Start of Symptoms (Trinary)</b>  | <b>Within 24-72 Hours vs. More than 72 Hours</b> | <b>2.88</b>       | <b>0.55</b>        | <b>14.97</b>       | <b>0.2087</b>  | <b>0.0717</b>     |
|                                     | <b>Within 24 Hours vs. More than 72 Hours</b>    | <b>4.97</b>       | <b>1.26</b>        | <b>19.55</b>       | <b>0.0218</b>  |                   |
| Symptom Progression                 | Improving vs. Stable                             | 1.61              | 0.38               | 6.83               | 0.5162         | 0.6432            |
|                                     | Worsening vs. Stable                             | 1.74              | 0.51               | 5.97               | 0.3816         |                   |
| Number of Floaters                  | More than 10 and Less than 100 vs. Less than 5   | 3.67              | 0.92               | 14.68              | 0.0663         | 0.1156            |
|                                     | More than 100 vs. Less than 5                    | 11.00             | 1.61               | 74.99              | 0.0143         |                   |
|                                     | More than 5 and Less than 10 vs. Less than 5     | <0.001            | <0.001             | >999.999           | 0.9751         |                   |
|                                     | None vs. Less than 5                             | 2.75              | 0.62               | 12.30              | 0.1856         |                   |
| <b>Number of Floaters (Binary)</b>  | <b>More Than 10 or None vs. 1-10</b>             | <b>4.40</b>       | <b>1.41</b>        | <b>13.74</b>       | <b>0.0109</b>  |                   |
| Floater Description                 | Big Blobs vs. Tiny Dots                          | <0.001            | <0.001             | >999.999           | 0.9610         | 0.7130            |
|                                     | Cobweb vs. Tiny Dots                             | <0.001            | <0.001             | >999.999           | 0.9688         |                   |
|                                     | Swirl vs. Tiny Dots                              | 0.27              | 0.03               | 2.30               | 0.2289         |                   |
|                                     | Other vs. Tiny Dots                              | 0.46              | 0.11               | 1.93               | 0.2917         |                   |
| <b>Floater Description (Binary)</b> | <b>Tiny Dots vs. All Others</b>                  | <b>5.21</b>       | <b>1.45</b>        | <b>18.74</b>       | <b>0.0116</b>  |                   |
| <i>Flashes</i>                      | <i>5 or More Per Day vs. Less than 5 Per Day</i> | <i>0.26</i>       | <i>0.03</i>        | <i>2.37</i>        | <i>0.2301</i>  | <i>0.3393</i>     |
|                                     | <i>None vs. Less than 5 Per Day</i>              | <i>1.23</i>       | <i>0.36</i>        | <i>4.21</i>        | <i>0.7419</i>  |                   |
| Flashes and Floaters                | Yes vs. No                                       | 0.43              | 0.11               | 1.58               | 0.2006         |                   |

|                                                   |                                                     |             |             |              |               |        |
|---------------------------------------------------|-----------------------------------------------------|-------------|-------------|--------------|---------------|--------|
| Blurred Vision                                    | Constant vs. None                                   | 4.14        | 1.35        | 12.72        | 0.0130        | 0.0456 |
|                                                   | Intermittent vs. None                               | <0.001      | <0.001      | >999.999     | 0.9683        |        |
| Blurred Vision (Binary)                           | Constant vs. Intermittent or None                   | 5.12        | 1.67        | 15.66        | 0.0042        |        |
| Presence of Curtain or Veil                       | Yes vs. No                                          | 2.30        | 0.59        | 8.97         | 0.2315        |        |
| <b>Constant Blurred Vision or Curtain or Veil</b> | <b>Yes vs. No</b>                                   | <b>6.82</b> | <b>2.04</b> | <b>22.78</b> | <b>0.0018</b> |        |
| Pain                                              | Dull or Achy vs. None                               | <0.001      | <0.001      | >999.999     | 0.9715        | 0.9620 |
|                                                   | Pressure Sensation vs. None                         | 2.30        | 0.45        | 11.72        | 0.3162        |        |
|                                                   | Scratchy, Sandy, or Foreign Body Sensation vs. None | <0.001      | <0.001      | >999.999     | 0.9832        |        |
|                                                   | Sharp vs. None                                      | <0.001      | <0.001      | >999.999     | 0.9890        |        |
|                                                   | Throbbing vs. None                                  | <0.001      | <0.001      | >999.999     | 0.9936        |        |
| Pain (Binary)                                     | Yes vs. No                                          | 0.56        | 0.12        | 2.61         | 0.4610        |        |
| <b>Use of Glasses to Drive While Young</b>        | <b>Yes vs. No</b>                                   | <b>3.83</b> | <b>1.04</b> | <b>14.21</b> | <b>0.0443</b> |        |
| History of RT/RD in the Same Eye                  | Yes vs. No                                          | 3.58        | 1.02        | 12.58        | 0.0470        |        |
| History of RT/RD in the Other Eye                 | Yes vs. No                                          | 4.05        | 1.30        | 12.56        | 0.0156        |        |
| <b>History of RT/RD in Either Eye</b>             | <b>Yes vs. No</b>                                   | <b>6.68</b> | <b>2.11</b> | <b>21.10</b> | <b>0.0012</b> |        |
| Current Symptoms Similar to Past RT/RD            | Yes vs. No                                          | 0.35        | 0.06        | 1.98         | 0.2354        |        |
| <i>Diabetic</i>                                   | <i>Yes vs. No</i>                                   | <i>0.54</i> | <i>0.12</i> | <i>2.53</i>  | <i>0.4369</i> |        |
| Uveitis                                           | Yes vs. No                                          | <0.001      | <0.001      | >999.999     | 1.000*        |        |
| Trauma                                            | More than 2 Months Ago vs. No                       | <0.001      | <0.001      | >999.999     | 0.9693        | 0.9991 |
|                                                   | Within the Past 2 Months vs. No                     | <0.001      | <0.001      | >999.999     | 0.9857        |        |
| Trauma (Binary)                                   | Any Trauma vs. No                                   | <0.001      | <0.001      | >999.999     | 0.2283*       |        |
| Prior Retinal Surgery in Either Eye               | More than 2 Months Ago vs. No                       | 8.02        | 2.21        | 29.08        | 0.0015        | 0.0007 |
|                                                   | Within the Past 2 Months vs. No                     | 17.75       | 3.23        | 97.68        | 0.0009        |        |

|                                                      |                                            |             |             |              |               |        |
|------------------------------------------------------|--------------------------------------------|-------------|-------------|--------------|---------------|--------|
| <b>Prior Retinal Surgery in Either Eye (Binary)</b>  | <b>Yes vs. No</b>                          | <b>9.60</b> | <b>2.85</b> | <b>32.33</b> | <b>0.0003</b> |        |
| Prior Cataract Surgery in Either Eye                 | More than 2 Months Ago vs. No              | 2.78        | 0.91        | 8.50         | 0.0736        | 0.2019 |
|                                                      | Within the Past 2 Months vs. No            | <0.001      | <0.001      | >999.999     | 0.9862        |        |
| <b>Prior Cataract Surgery in Either Eye (Binary)</b> | <b>Yes vs. No</b>                          | <b>2.45</b> | <b>0.80</b> | <b>7.45</b>  | <b>0.1153</b> |        |
| Last PCP visit                                       | More than 2 Years Ago vs. Within Past Year | 2.20        | 0.20        | 23.74        | 0.5159        | 0.8680 |
|                                                      | Within Past 2 Years vs. Within Past Year   | <0.001      | <0.001      | >999.999     | 0.9757        |        |
|                                                      | Within Past 3 Months vs. Within Past Year  | 0.49        | 0.11        | 2.16         | 0.3451        |        |
|                                                      | Within Past 6 Months vs. Within Past Year  | 0.80        | 0.14        | 4.46         | 0.7990        |        |
|                                                      | Within Past 1 Month vs. Within Past Year   | 0.64        | 0.15        | 2.87         | 0.5634        |        |
| Last PCP Visit (Binary)                              | More than 6 months Ago vs. Within 6 months | 1.42        | 0.47        | 4.26         | 0.5367        |        |

\* = Fisher's Exact Test

**Table S2.** Univariate Analysis of Phone Triage Data. **Bolded variables** and associated levels (all with p-value of 0.2 or less) were used in subsequent multivariable logistic regression analysis. *Italicized variables* and associated levels were also used in subsequent multivariable logistic regression analysis despite a p-value of >0.2 in univariate analysis for reasons detailed in the text.

| Variable                                          | Level                                         | OR          | 95% OR<br>CI Lower | 95% OR<br>CI Upper | P-value       | Global<br>P-Value |
|---------------------------------------------------|-----------------------------------------------|-------------|--------------------|--------------------|---------------|-------------------|
| Sex                                               | Male vs. Female                               | 1.39        | 0.38               | 5.16               | 0.6204        |                   |
| <b>Eye</b>                                        | <b>OD/OS vs. OU</b>                           | <b>0.06</b> | <b>0.00</b>        | <b>3.17</b>        | <b>0.1627</b> |                   |
| <b>Start of Symptoms</b>                          | <b>More than 72 Hours vs. Within 72 Hours</b> | <b>0.38</b> | <b>0.10</b>        | <b>1.47</b>        | <b>0.1600</b> |                   |
| Floater                                           | More Than 10 or None vs. 1-10                 | 1.62        | 0.36               | 7.31               | 0.5323        |                   |
| Floater Description                               | Not Applicable vs. All Others                 | 1.14        | 0.14               | 9.41               | 0.9029        | 0.7112            |
|                                                   | Tiny Dots vs. All Others                      | 1.81        | 0.43               | 7.60               | 0.4170        |                   |
| Flashes                                           | Equal to or Greater than 5 or None vs. 1-5    | 1.60        | 0.34               | 7.43               | 0.5501        |                   |
| <b>Constant Blurred Vision or Curtain or Veil</b> | <b>Yes vs. No</b>                             | <b>7.33</b> | <b>1.73</b>        | <b>31.04</b>       | <b>0.0068</b> |                   |
| <b>Use of Glasses to Drive While Young</b>        | <b>Yes vs. No</b>                             | <b>2.08</b> | <b>0.52</b>        | <b>8.28</b>        | <b>0.2998</b> |                   |
| <i>History of RT/RD in Either Eye</i>             | <i>Yes vs. No</i>                             | <i>1.38</i> | <i>0.29</i>        | <i>6.61</i>        | <i>0.6850</i> |                   |
| <b>Prior Retinal Surgery in Either Eye</b>        | <b>Yes vs. No</b>                             | <b>9.90</b> | <b>1.55</b>        | <b>63.41</b>       | <b>0.0156</b> |                   |
| Prior Cataract Surgery in Symptomatic Eye         | Yes vs. No                                    | 1.04        | 0.22               | 4.92               | 0.9583        |                   |
| <b>Diabetic</b>                                   | <b>Yes vs. No</b>                             | <b>0.19</b> | <b>0.03</b>        | <b>1.34</b>        | <b>0.0955</b> |                   |

**Table S3.** Full Multivariable Model Analysis Based on Phone Triage Data. Variables with  $p < 0.3$  are in **bold** and were carried forward to more parsimonious multivariable models. Variables that are *italicized* had  $p > 0.3$  but were carried forward to more parsimonious models for reasons described in the text.



| <b>Variable</b>                            | <b>Level</b>                           | <b>OR</b> | <b>95% OR<br/>CI Lower</b> | <b>95% OR<br/>CI Upper</b> | <b>P-value</b> |
|--------------------------------------------|----------------------------------------|-----------|----------------------------|----------------------------|----------------|
| Eye                                        | OD/OS vs. OU                           | 0.16      | 0.01                       | 4.41                       | 0.2765         |
| Start of Symptoms                          | More than 72 Hours vs. Within 72 Hours | 0.51      | 0.14                       | 1.81                       | 0.2951         |
| Constant Blurred Vision or Curtain or Veil | Yes vs. No                             | 8.37      | 2.40                       | 29.22                      | 0.0009         |
| Use of Glasses to Drive While Young        | Yes vs. No                             | 1.85      | 0.50                       | 6.93                       | 0.3594         |
| Diabetic                                   | Yes vs. No                             | 0.53      | 0.11                       | 2.46                       | 0.4171         |
| History of RT/RD in Either Eye             | Yes vs. No                             | 6.03      | 1.75                       | 20.81                      | 0.0045         |

**Table S5.** Full Multivariable Model for Phone Triage Data Without “Past Retinal Surgery in Either Eye” Variable.
